# Supplementary material for: Exogenous natural EPA-enriched phosphatidylcholine and phosphatidylethanolamine ameliorate lipid accumulation and insulin resistance via activation of PPARα/γ in mice
Source: Royal Society of Chemistry journal article supplement (doi:10.1039/d0fo01219j), 2020-01-01
Supplement: d0fo01219j1.pdf [file d0fo01219j1.pdf]

**Exogenous Natural EPA-enriched phosphatidylcholine and phosphatidylethanolamine  
ameliorate Lipid Accumulation and Insulin Resistance via Activation of PPAR $\alpha$ / $\gamma$  in  
mice**

Yingying Tian<sup>ac†</sup>, Yanjun Liu<sup>ad†</sup>, Changhu Xue<sup>ab\*</sup>, Jingfeng Wang<sup>a\*</sup>, Yuming Wang<sup>a</sup>, Jie Xu<sup>a\*</sup>,

Zhaojie Li<sup>a</sup>

<sup>a</sup> College of Food Science and Engineering, Ocean University of China, Qingdao, China.

<sup>b</sup> National Laboratory for Marine Science and Technology, Qingdao, China.

<sup>c</sup> Marine Biomedical Research Institute of Qingdao, Qingdao, China.

<sup>d</sup> School of Food Science and Technology, Jiangnan University, 1800, Lihu Road, 214122,  
Wuxi, Jiangsu Province, China.

† Yingying Tian and Yanjun Liu have contributed equally to this work.

\* Correspondence: Correspondence: Dr. Changhu Xue (xuechanghuouc@163.com, Tel.: +86-0532-82032468), Dr. Jingfeng Wang (jfwang@ouc.edu.cn, Tel.: +86-0532-82031967), and Dr. Jie Xu (xujie9@ouc.edu.cn; Tel.: +86-0532-82031948).

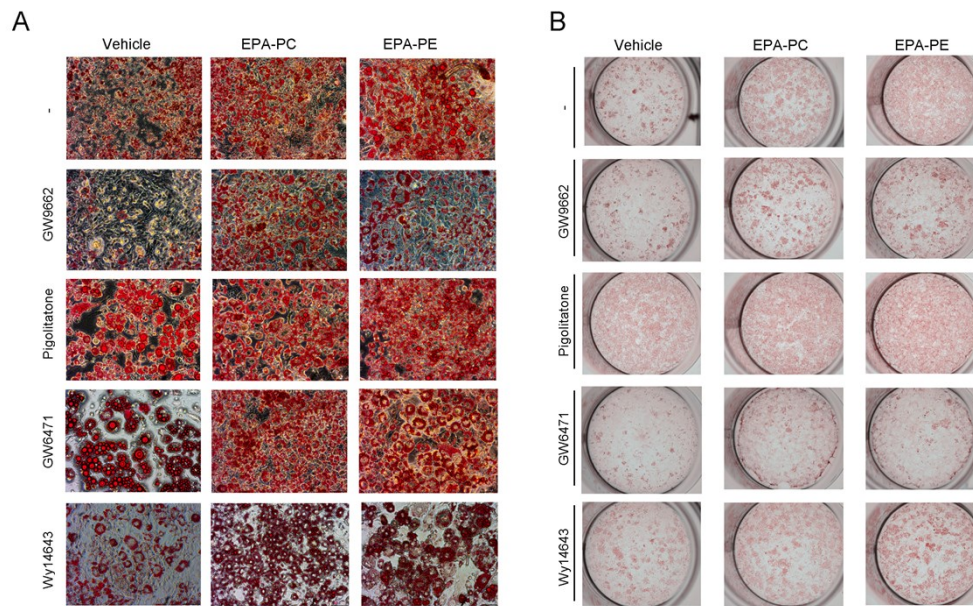

**Fig. S1** EPA-PC and EPA-PE alter adipocytes differentiation and lipid accumulation by PPAR $\alpha/\gamma$ . (A) Lipid accumulation was examined by oil red O staining with or without MDI cocktail-treatment, and (B) cells was dissolved by isopropanol and measured at 570 nm to quantify the effect on adipocyte differentiation.

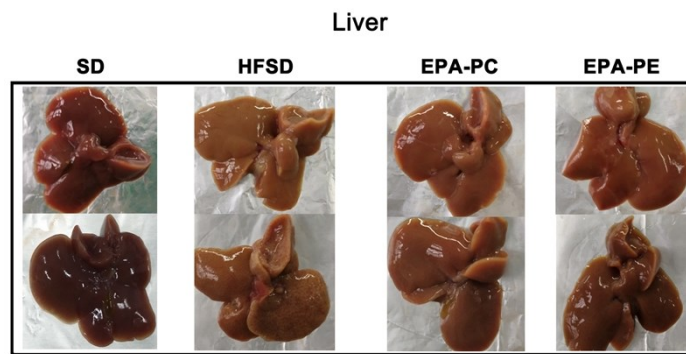

**Fig. S2** The representative images of liver in mice fed with HFSD or EPA-PC, EPA-PE.

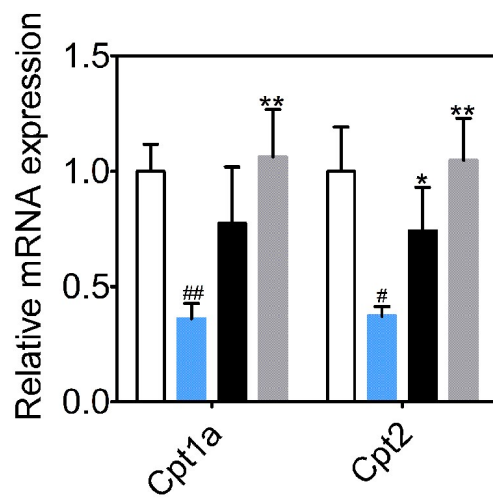

**Fig. S3** EPA-PC and EPA-PE activated PPAR $\alpha$  transcription in iWAT. Mice was treated with HFSD, or HFSD with supplementation of EPA-PC or EPA-PE for 12 weeks. The mRNA expression of *Cpt1a* and *Cpt2* in iWAT tissues were measured.

Table 1 Primer sequences used for Quantitative Real-Time PCR

| Gene           | Primer (5'-3') | Sequences                |
|----------------|----------------|--------------------------|
| Ppara          | Forward        | AGACCGTCACGGAGCTCACA     |
|                | Reverse        | GGCCTGCCATCTCAGGAAAG     |
| Cpt1           | Forward        | CATGTCAAGCCAGACGAAGA     |
|                | Reverse        | TGGTAGGAGAGCAGCACCTT     |
| Cpt2           | Forward        | GCTCCGAGGCATTTGTCA       |
|                | Reverse        | CCCATCGCTGCTTCTTTG       |
| Acox           | Forward        | GTATAAACTCTTCCCCTCCTG    |
|                | Reverse        | CCAGGTAGTAAAAGCCTTCAGC   |
| Fas            | Forward        | CAGCCATGGAGGAGGTGGTGATT  |
|                | Reverse        | CGAAGAAGGAGGCATCAAACCTA  |
| Ppar $\gamma$  | Forward        | TGGGTGAAACTCTGGGAGAT     |
|                | Reverse        | CCATAGTGGAAGCCTGATGC     |
| Lpl            | Forward        | ATCGGAGAACTGCTCATGATGA   |
|                | Reverse        | CGGATCCTCTCGATGACGAA     |
| FABP4          | Forward        | CATGGCCAAGCCCAACAT       |
|                | Reverse        | CGCCCAGTTTGAAGGAAATC     |
| Cebp $\alpha$  | Forward        | GTGCTGGAGTTGACCAGTGA     |
|                | Reverse        | CCAAGGAGCTCTCAGGCAG      |
| Scd1           | Forward        | GCCCCTCTACTTGGAAGACGA    |
|                | Reverse        | AAGTGATCCCATACAGGGCTC    |
| Cd36           | Forward        | GGAGCCATCTTTGAGCCTTCA    |
|                | Reverse        | GAACCAAACCTGAGGAATGGATCT |
| Ucp1           | Forward        | AACTGTACAGCGGTCTGCCT     |
|                | Reverse        | TAAGCCGGCTGAGATCTTGT     |
| Pgc-1 $\alpha$ | Forward        | AATGCAGCGGTCTTAGCACT     |
|                | Reverse        | TGTTGACAAATGCTCTTCGC     |
| Prdm16         | Forward        | TGGGCTCACTACCCTACCAC     |
|                | Reverse        | GACTTTGGCTCAGCCTTGAC     |
| Dio2           | Forward        | ACACTGGAATTGGGAGCATC     |
|                | Reverse        | ATGCTGACCTCAGAAGGGCT     |
